# Supplementary material for: Trade-Off between Sampling Frequency and Duration and Their Influences on the Estimation of Space Use of Japanese Macaques
Source: Hindawi journal article supplement (doi:10.1155/2023/1384365), 2023-10-04
Supplement: f1 [file 1384365.f1.docx]

**Appendix S1**

**Table S1.** Sampling schedules in relation to sampling frequency in our original and manipulated datasets. Each row represents a single schedule where “x” indicates an hour that a location is used. Locations refer to the total number of locations per day, and *r* refers to the reduction rate of the sampling frequency. The schedule with 13 locations per day (*r* = 1) corresponds to the original dataset.

| Locations  per day | *r* | Sampling hour (local hour of day) | | | | | | | | | | | | |
| --- | --- | --- | --- | --- | --- | --- | --- | --- | --- | --- | --- | --- | --- | --- |
| 6 | 7 | 8 | 9 | 10 | 11 | 12 | 13 | 14 | 15 | 16 | 17 | 18 |
| 13 | 1 | x | x | x | x | x | x | x | x | x | x | x | x | x |
| 10 | 5/6 |  | x | x | x | x | x |  | x | x | x | x | x |  |
| 11 | 5/6 | x |  | x | x | x | x | x |  | x | x | x | x | x |
| 11 | 5/6 | x | x |  | x | x | x | x | x |  | x | x | x | x |
| 11 | 5/6 | x | x | x |  | x | x | x | x | x |  | x | x | x |
| 11 | 5/6 | x | x | x | x |  | x | x | x | x | x |  | x | x |
| 11 | 5/6 | x | x | x | x | x |  | x | x | x | x | x |  | x |
| 9 | 3/4 |  | x | x | x |  | x | x | x |  | x | x | x |  |
| 10 | 3/4 | x |  | x | x | x |  | x | x | x |  | x | x | x |
| 10 | 3/4 | x | x |  | x | x | x |  | x | x | x |  | x | x |
| 10 | 3/4 | x | x | x |  | x | x | x |  | x | x | x |  | x |
| 8 | 2/3 |  | x | x |  | x | x |  | x | x |  | x | x |  |
| 9 | 2/3 | x |  | x | x |  | x | x |  | x | x |  | x | x |
| 9 | 2/3 | x | x |  | x | x | x |  | x | x |  | x | x | x |
| 7 | 1/2 | x |  | x |  | x |  | x |  | x |  | x |  | x |
| 6 | 1/2 |  | x |  | x |  | x |  | x |  | x |  | x |  |
| 5 | 1/3 | x |  |  | x |  |  | x |  |  | x |  |  | x |
| 4 | 1/3 |  | x |  |  | x |  |  | x |  |  | x |  |  |
| 4 | 1/3 |  |  | x |  |  | x |  |  | x |  |  | x |  |
| 3 | 1/6 | x |  |  |  |  |  | x |  |  |  |  |  | x |
| 2 | 1/6 |  | x |  |  |  |  |  | x |  |  |  |  |  |
| 2 | 1/6 |  |  | x |  |  |  |  |  | x |  |  |  |  |
| 2 | 1/6 |  |  |  | x |  |  |  |  |  | x |  |  |  |
| 2 | 1/6 |  |  |  |  | x |  |  |  |  |  | x |  |  |
| 2 | 1/6 |  |  |  |  |  | x |  |  |  |  |  | x |  |
| 1 | 1/13 | x |  |  |  |  |  |  |  |  |  |  |  |  |
| 1 | 1/13 |  | x |  |  |  |  |  |  |  |  |  |  |  |
| 1 | 1/13 |  |  | x |  |  |  |  |  |  |  |  |  |  |
| 1 | 1/13 |  |  |  | x |  |  |  |  |  |  |  |  |  |
| 1 | 1/13 |  |  |  |  | x |  |  |  |  |  |  |  |  |
| 1 | 1/13 |  |  |  |  |  | x |  |  |  |  |  |  |  |
| 1 | 1/13 |  |  |  |  |  |  | x |  |  |  |  |  |  |
| 1 | 1/13 |  |  |  |  |  |  |  | x |  |  |  |  |  |
| 1 | 1/13 |  |  |  |  |  |  |  |  | x |  |  |  |  |
| 1 | 1/13 |  |  |  |  |  |  |  |  |  | x |  |  |  |
| 1 | 1/13 |  |  |  |  |  |  |  |  |  |  | x |  |  |
| 1 | 1/13 |  |  |  |  |  |  |  |  |  |  |  | x |  |
| 1 | 1/13 |  |  |  |  |  |  |  |  |  |  |  |  | x |

**Figure S1.** Effects of reductions in sampling frequency (*f*) and duration (*T*) on MUA estimates using simulated data with 180 (a), 360 (b), 720 (c), and 1080 days (d). The simulated data created by a biased correlated random walk (BCRW; Long et al., 2014). Location data were generated with BCRW parameters based on Gilbertson et al. (2020): *h* = 34, *ρ* = 0.8, *b* = 0.01, and *c* = 0.3. We assumed that there were 13 location data per day as in the text and ran 100 simulations for each sampling duration (180, 360, 720 and 1080 days). We performed all simulations in R v 3.6.1 (R Core Team, 2019). BCRW R code was adapted from Gilbertson et al. (2020). Following the Japanese macaque data in the text, we used the same reduction rates for the sampling duration (i.e., *r* = 5/6, 3/4, 2/3, 1/2, 1/3, 1/6, and 1/13). Numbers in brackets on the *x*-axis indicate the reduction rate (*r*) for the sampling duration. Regarding the sampling frequency, plots for *r* = 1, 1/2, 1/3, 1/6, and 1/13 (corresponding to intervals of 1, 2, 3, 6, and 24 hours, respectively) were indicated. The area ratio (*AR*) represents the mean predicted areas estimated using manipulated datasets with reduced frequency and duration (*fr*, *Tr*), divided by the reference area estimated using the original dataset (*f*1, *T*1). The gray lines depict parity between the reference and predicted areas (i.e., *AR* = 1). Note that *y*-axes are expressed on a log-scale.

**Figure S2.** Effects of reductions in sampling frequency (*f*) and duration (*T*) on MUA estimates using location data of the bobcat, *Lynx rufus* (a), and the coyote, *Canis latrans* (b). The bobcat data are available on Movebank (movebank.org, study name "Carnivore movements near Black Rock Forest New York", study ID 1088836380). The coyote data are openly available (Chamberlain et al., 2021), and we focused on transient coyotes (collar ID = "40909", "40907", "40908", and "40905"). Numbers in brackets on the *x*-axis indicate the reduction rate (*r*) for the sampling duration. The gray lines depict parity between the reference and predicted areas (i.e., *AR* = 1). Note that *y*-axes are expressed on a log-scale.

**Figure S3.** Comparison of the variation in area ratio between 95%-aKDE (autocorrelated kernel density estimation) and 95%-KDEhref (KDE with the reference bandwidth method), at different sampling frequency, for Japanese macaque (a) and simulated data (b). In the simulated data created by a biased correlated random walk (BCRW; Long et al., 2014), location data were generated with BCRW parameters based on Gilbertson et al. (2020): *h* = 34, *ρ* = 0.8, *b* = 0.01, and *c* = 0.3. We assumed that there were 13 location data per day as in the text and that the full observation period was 1080 days (corresponding to 3 years). We ran 100 simulations. All analyses were performed in R v. 3.6.1 (R Core Team, 2019), using the range estimation techniques implemented in the R packages *adehabitatHR* v. 0.4.16 (Calenge, 2006) and *ctmm* (Calabrese et al., 2016). BCRW R code was adapted from Gilbertson et al. (2020).

**Figure S4.** Standard deviation (SD) in smoothing parameter (bandwidth, *h*) at different sampling frequency for Japanese macaque (a) and simulated data (b). In the simulated data created by a biased correlated random walk (BCRW; Long et al., 2014), location data were generated with BCRW parameters based on Gilbertson et al. (2020): *h* = 34, *ρ* = 0.8, *b* = 0.01, and *c* = 0.3. We assumed that there were 13 location data per day as in the text and that the full observation period was 1080 days (ca. 3 years). All analyses were performed in R v. 3.6.1 (R Core Team, 2019), using the range estimation techniques implemented in the R packages *adehabitatHR* v. 0.4.16 (Calenge, 2006). BCRW R code was adapted from Gilbertson et al. (2020).

**Figure S5.** Distribution map of monthly home ranges of nine troops (TID1–TID9) estimated using KDEhref. Months with < 20 days were removed from the distribution map.

**Figure S6.** Examples of the reference and predicted areas estimated with KDEhref and dBBMM for three troops of Japanese macaques (TID2, TID7, and TID8). The black area represents the reference area estimated from the original dataset (*f*1, *T*1) and the gray area represents the predicted area estimated from the manipulated dataset with the reduced sampling duration (*f*1, *T*1/13). The area ratio (*AR*), defined as the predicted area divided by the reference area, was also indicated.

**Figure S7.** Effects of reductions in sampling frequency (*f*) and duration (*T*) on the home-range estimates based on KDElscv (KDE with least-squares cross-validation as the bandwidth selection algorism) using Japanese macaque data. (a) Effects on the area ratio defined as the predicted area divided by the reference area. The gray line depicts parity between the reference and predicted areas (i.e., *AR* = 1). Note that *y*-axis is expressed on a log-scale. (b) Effects on errors of omission (false negative, FN). The omission error ratio (*ER*omi) represents the mean FN areas divided by the reference area. (c) Effects on errors of commission (false positive, FP). The commission error ratio (*ER*com) represents the mean FP areas divided by the reference area.

**Figure S8.** Effects of reductions in sampling frequency (*f*) and duration (*T*) on the 50%-KDEhref (a), 50%-KDElscv (b), and 50%-dBBMM estimates (c) using Japanese macaque data. The gray lines depict parity between the reference and predicted areas (i.e., *AR* = 1). Note that *y*-axes are expressed on a log-scale.

**Figure S9.** Effects of reductions in sampling frequency (*f*) and duration (*T*) on KDEhref and dBBMM estimates using bobcat (a and b), and coyote data (c and d). The bobcat data are available on Movebank (movebank.org, study name "Carnivore movements near Black Rock Forest New York", study ID 1088836380). The coyote data are openly available (Chamberlain et al., 2021), and we focused on transient coyotes (collar ID = "40909", "40907", "40908", and "40905"). The gray lines depict parity between the reference and predicted areas (i.e., *AR* = 1). Note that *y*-axes are expressed on a log-scale.

**Figure S10.** Effects of the simultaneous reductions in sampling frequency (*f*) and duration (*T*) on home-range estimates (KDEhref and dBBMM) using Japanese macaque (a and b), bobcat (c and d), and coyote data (e and f), where the sampling frequency (*f*) and duration were reduced at the same reduction rate (*r*). The gray lines depict parity between the reference and predicted areas (i.e., *AR* = 1). Note that *y*-axes are expressed on a log-scale.

**References**

Calabrese, J. M., Fleming, C. H., & Gurarie, E. (2016). Ctmm: an R package for analyzing animal relocation data as a continuous-time stochastic process. *Methods in Ecology and Evolution*, **7**, 1124–1132.

Calenge, C. (2006). The package "adehabitat" for the R software: A tool for the analysis of space and habitat use by animals. *Ecological Modeling*, **197**, 516–519.

Chamberlain, M. J., Cohen, B. S., Wightman, P. H., Rushton, E., & Hinton, J. W. (2021). Fine-scale movements and behaviors of coyotes (*Canis latrans*) during their reproductive period. *Ecology and Evolution*, **11**, 9575–9588.

Gilbertson, M. L. J., White, L. A., & Craft, M. E. (2020). Trade-offs with telemetry-derived contact networks for infectious disease studies in wildlife. *Methods in Ecology and Evolution*, **12**, 76–87.

Long, J. A., Nelson, T. A., Webb, S. L., & Gee, K. L. (2014). A critical examination of indices of dynamic interaction for wildlife telemetry studies. *Journal of Animal Ecology*, **83**, 1216–1233.

R Core Team. (2019). *R: A Language and Environment for Statistical Computing*. R Foundation for Statistical Computing. http://www.r-project.org/.
